# Supplementary material for: Sequence Diversity of Tp1 and Tp2 Antigens and Population Genetic Analysis of Theileria parva in Unvaccinated Cattle in Zambia’s Chongwe and Chisamba Districts
Source: MDPI journal article supplement (doi:10.3390/pathogens11020114), 2022-01-19
Supplement: s1 [file s1]

Supplementary Table S2. List of samples and accession numbers used in this study

| <b>Gene</b> | <b>Sample ID</b> | <b>District</b> | <b>Veterinary Camp</b> | <b>Accession number</b> |
|-------------|------------------|-----------------|------------------------|-------------------------|
| Tp2         | 4C1              | Chongwe         | Chalimbana             | LC645702                |
|             | 5C2              | Chongwe         | Chalimbana             | LC645703                |
|             | 6C3              | Chongwe         | Chalimbana             | LC645704                |
|             | 7C4              | Chongwe         | Chalimbana             | LC645705                |
|             | 8C5              | Chongwe         | Chalimbana             | LC645706                |
|             | 11C6             | Chongwe         | Chalimbana             | LC645707                |
|             | 12C7             | Chongwe         | Chalimbana             | LC645708                |
|             | 13C8             | Chongwe         | Chalimbana             | LC645709                |
|             | 19C10            | Chongwe         | Chalimbana             | LC645710                |
|             | 20C11            | Chongwe         | Chalimbana             | LC645711                |
|             | 21C12            | Chongwe         | Chalimbana             | LC645712                |
|             | 22C13            | Chongwe         | Chalimbana             | LC645713                |
|             | 23C14            | Chongwe         | Chalimbana             | LC645714                |
|             | 24C15            | Chongwe         | Chalimbana             | LC645715                |
|             | 28C16            | Chongwe         | Chalimbana             | LC645716                |
|             | 29C17            | Chongwe         | Chalimbana             | LC645717                |
|             | 31C18            | Chongwe         | Chalimbana             | LC645718                |
|             | 32C19            | Chongwe         | Chalimbana             | LC645719                |
|             | 33C20            | Chongwe         | Chalimbana             | LC645720                |
|             | 35C21            | Chongwe         | Chalimbana             | LC645721                |
|             | 36C22            | Chongwe         | Chalimbana             | LC645722                |
|             | 38C23            | Chongwe         | Chalimbana             | LC645723                |
|             | 40C24            | Chongwe         | Chalimbana             | LC645724                |
|             | 41C25            | Chongwe         | Chalimbana             | LC645725                |
|             | 42C26            | Chongwe         | Chalimbana             | LC645726                |
|             | 45C27            | Chongwe         | Chalimbana             | LC645727                |
|             | 48C28            | Chongwe         | Chalimbana             | LC645728                |
|             | 50C29            | Chongwe         | Chinkuli               | LC645729                |
|             | 51C30            | Chongwe         | Chinkuli               | LC645730                |
|             | 52C31            | Chongwe         | Chinkuli               | LC645731                |
|             | 54C32            | Chongwe         | Chinkuli               | LC645732                |
|             | 55C33            | Chongwe         | Chinkuli               | LC645733                |
|             | 56C34            | Chongwe         | Chinkuli               | LC645734                |
|             | 57C35            | Chongwe         | Chinkuli               | LC645735                |
|             | 58C36            | Chongwe         | Chinkuli               | LC645736                |
|             | 59C37            | Chongwe         | Lwimba                 | LC645737                |
|             | 61C38            | Chongwe         | Lwimba                 | LC645738                |
|             | 62C39            | Chongwe         | Lwimba                 | LC645739                |
|             | 63C40            | Chongwe         | Lwimba                 | LC645740                |
|             | 64C41            | Chongwe         | Lwimba                 | LC645741                |
|             | 65C42            | Chongwe         | Chinkuli               | LC645742                |
|             | 66C43            | Chongwe         | Palabana               | LC645743                |

|  |        |         |                 |          |
|--|--------|---------|-----------------|----------|
|  | 68C44  | Chongwe | Lwimba          | LC645744 |
|  | 69C45  | Chongwe | Lwimba          | LC645745 |
|  | 70C46  | Chongwe | Lwimba          | LC645746 |
|  | 72C47  | Chongwe | Palabana        | LC645747 |
|  | 75C48  | Chongwe | Palabana        | LC645748 |
|  | 76C49  | Chongwe | Palabana        | LC645749 |
|  | 78C50  | Chongwe | Chongwe Central | LC645750 |
|  | 80C51  | Chongwe | Chongwe Central | LC645751 |
|  | 81C52  | Chongwe | Chongwe Central | LC645752 |
|  | 86C54  | Chongwe | Chongwe Central | LC645753 |
|  | 87C55  | Chongwe | Chongwe Central | LC645754 |
|  | 88C56  | Chongwe | Chongwe Central | LC645755 |
|  | 89C57  | Chongwe | Chongwe Central | LC645756 |
|  | 90C58  | Chongwe | Chongwe Central | LC645757 |
|  | 91C59  | Chongwe | Chongwe Central | LC645758 |
|  | 92C60  | Chongwe | Chongwe Central | LC645759 |
|  | 93C61  | Chongwe | Chongwe Central | LC645760 |
|  | 94C62  | Chongwe | Chongwe Central | LC645761 |
|  | 95C63  | Chongwe | Chongwe Central | LC645762 |
|  | 96C64  | Chongwe | Chongwe Central | LC645763 |
|  | 97C65  | Chongwe | Chongwe Central | LC645764 |
|  | 98C66  | Chongwe | Chongwe Central | LC645765 |
|  | 99C67  | Chongwe | Chongwe Central | LC645766 |
|  | 100C68 | Chongwe | Chinkuli        | LC645767 |
|  | 101C69 | Chongwe | Chinkuli        | LC645768 |
|  | 102C70 | Chongwe | Chinkuli        | LC645769 |
|  | 1X20   | Chongwe | Chalimbana      | LC645770 |
|  | 1X21   | Chongwe | Chalimbana      | LC645771 |
|  | 3X22   | Chongwe | Chalimbana      | LC645772 |
|  | 6X76   | Chongwe | Chalimbana      | LC645773 |
|  | 9X23   | Chongwe | Chalimbana      | LC645774 |
|  | 10X24  | Chongwe | Chalimbana      | LC645775 |
|  | 12X40  | Chongwe | Chalimbana      | LC645776 |
|  | 14X25  | Chongwe | Chalimbana      | LC645777 |
|  | 16X26  | Chongwe | Chalimbana      | LC645778 |
|  | 16X41  | Chongwe | Chalimbana      | LC645779 |
|  | 17X42  | Chongwe | Chalimbana      | LC645780 |
|  | 21X43  | Chongwe | Chalimbana      | LC645781 |
|  | 31X78  | Chongwe | Chalimbana      | LC645782 |
|  | 35X27  | Chongwe | Chalimbana      | LC645783 |
|  | 40X44  | Chongwe | Chalimbana      | LC645784 |
|  | 40X79  | Chongwe | Chalimbana      | LC645785 |
|  | 44X28  | Chongwe | Chalimbana      | LC645786 |
|  | 48X45  | Chongwe | Chalimbana      | LC645787 |
|  | 51X29  | Chongwe | Lwimba          | LC645788 |

|  |        |          |                 |          |
|--|--------|----------|-----------------|----------|
|  | 53X80  | Chongwe  | Chinkuli        | LC645789 |
|  | 56X46  | Chongwe  | Lwimba          | LC645790 |
|  | 58X30  | Chongwe  | Chinkuli        | LC645791 |
|  | 62X31  | Chongwe  | Lwimba          | LC645792 |
|  | 64X32  | Chongwe  | Lwimba          | LC645793 |
|  | 65X33  | Chongwe  | Chinkuli        | LC645794 |
|  | 68X34  | Chongwe  | Lwimba          | LC645795 |
|  | 68X47  | Chongwe  | Lwimba          | LC645796 |
|  | 70X35  | Chongwe  | Lwimba          | LC645797 |
|  | 71X48  | Chongwe  | Palabana        | LC645798 |
|  | 72X49  | Chongwe  | Palabana        | LC645799 |
|  | 73X36  | Chongwe  | Palabana        | LC645800 |
|  | 73X50  | Chongwe  | Palabana        | LC645801 |
|  | 74X37  | Chongwe  | Palabana        | LC645802 |
|  | 76X38  | Chongwe  | Palabana        | LC645803 |
|  | 79X51  | Chongwe  | Chongwe Central | LC645804 |
|  | 80X52  | Chongwe  | Chongwe Central | LC645805 |
|  | 82X53  | Chongwe  | Chongwe Central | LC645806 |
|  | 83X54  | Chongwe  | Chongwe Central | LC645807 |
|  | 88X55  | Chongwe  | Chongwe Central | LC645808 |
|  | 90X56  | Chongwe  | Chongwe Central | LC645809 |
|  | 94X57  | Chongwe  | Chongwe Central | LC645810 |
|  | 95X39  | Chongwe  | Chongwe Central | LC645811 |
|  | 96X58  | Chongwe  | Chongwe Central | LC645812 |
|  | 97X59  | Chongwe  | Chongwe Central | LC645813 |
|  | 100X60 | Chongwe  | Chinkuli        | LC645814 |
|  | 103X61 | Chongwe  | Chinkuli        | LC645815 |
|  | 104X62 | Chongwe  | Chinkuli        | LC645816 |
|  | 105X64 | Chongwe  | Chinkuli        | LC645817 |
|  | 108X65 | Chongwe  | Chinkuli        | LC645818 |
|  | 109X66 | Chongwe  | Chinkuli        | LC645819 |
|  | 110X67 | Chongwe  | Chinkuli        | LC645820 |
|  | 111X68 | Chongwe  | Chinkuli        | LC645821 |
|  | 114X69 | Chongwe  | Chinkuli        | LC645822 |
|  | 115X70 | Chongwe  | Chinkuli        | LC645823 |
|  | 116X63 | Chongwe  | Chinkuli        | LC645824 |
|  | 118X72 | Chongwe  | Chinkuli        | LC645825 |
|  | 120X73 | Chongwe  | Chinkuli        | LC645826 |
|  | 121X74 | Chongwe  | Chinkuli        | LC645827 |
|  | 122X75 | Chongwe  | Chinkuli        | LC645828 |
|  | 127X81 | Chongwe  | Chinkuli        | LC645829 |
|  | 2BA55  | Chisamba | Muswishi        | LC645830 |
|  | 3BA56  | Chisamba | Muswishi        | LC645831 |
|  | 5BA57  | Chisamba | Muswishi        | LC645832 |
|  | 6BA58  | Chisamba | Muswishi        | LC645833 |

|     |        |          |                  |          |
|-----|--------|----------|------------------|----------|
|     | 9BA59  | Chisamba | Muswishi         | LC645834 |
|     | 13BA60 | Chisamba | Chisamba Central | LC645835 |
|     | 15BA61 | Chisamba | Chisamba Central | LC645836 |
|     | 16BA62 | Chisamba | Chisamba Central | LC645837 |
|     | 20BA63 | Chisamba | Chisamba Central | LC645838 |
|     | 22BA64 | Chisamba | Chisamba Central | LC645839 |
|     | 24BA65 | Chisamba | Chisamba Central | LC645840 |
|     | 25BA66 | Chisamba | Chisamba Central | LC645841 |
|     | 26BA69 | Chisamba | Chisamba Central | LC645842 |
|     | 27BA67 | Chisamba | Chisamba Central | LC645843 |
|     |        |          |                  |          |
| Tp1 | KL 11  | Katete   | Katete           | LC645844 |
|     | 5X8    | Chongwe  | Chalimbana       | LC645845 |
|     | 06X60  | Chongwe  | Chalimbana       | LC645846 |
|     | 9X9    | Chongwe  | Chalimbana       | LC645847 |
|     | 10X10  | Chongwe  | Chalimbana       | LC645848 |
|     | 11C8   | Chongwe  | Chalimbana       | LC645849 |
|     | 12C9   | Chongwe  | Chalimbana       | LC645850 |
|     | 16X11  | Chongwe  | Chalimbana       | LC645851 |
|     | 18X12  | Chongwe  | Chalimbana       | LC645852 |
|     | 19C13  | Chongwe  | Chalimbana       | LC645853 |
|     | 21C14  | Chongwe  | Chalimbana       | LC645854 |
|     | 22C15  | Chongwe  | Chalimbana       | LC645855 |
|     | 23C16  | Chongwe  | Chalimbana       | LC645856 |
|     | 25X14  | Chongwe  | Chalimbana       | LC645857 |
|     | 28C17  | Chongwe  | Chalimbana       | LC645858 |
|     | 29X15  | Chongwe  | Chalimbana       | LC645859 |
|     | 31C18  | Chongwe  | Chalimbana       | LC645860 |
|     | 31X62  | Chongwe  | Chalimbana       | LC645861 |
|     | 35X16  | Chongwe  | Chalimbana       | LC645862 |
|     | 36C20  | Chongwe  | Chalimbana       | LC645863 |
|     | 38C21  | Chongwe  | Chalimbana       | LC645864 |
|     | 40X63  | Chongwe  | Chalimbana       | LC645865 |
|     | 41C23  | Chongwe  | Chalimbana       | LC645866 |
|     | 42C24  | Chongwe  | Chalimbana       | LC645867 |
|     | 44X17  | Chongwe  | Chalimbana       | LC645868 |
|     | 48C26  | Chongwe  | Chalimbana       | LC645869 |
|     | 48X18  | Chongwe  | Chalimbana       | LC645870 |
|     | 50C27  | Chongwe  | Chalimbana       | LC645871 |
|     | 1C1    | Chongwe  | Chalimbana       | LC645872 |
|     | 2C2    | Chongwe  | Chalimbana       | LC645873 |
|     | 3C3    | Chongwe  | Chalimbana       | LC645874 |
|     | 4C4c   | Chongwe  | Chalimbana       | LC645875 |
|     | 6C5    | Chongwe  | Chalimbana       | LC645876 |
|     | 7C6    | Chongwe  | Chalimbana       | LC645877 |

|  |        |         |            |          |
|--|--------|---------|------------|----------|
|  | 8C7    | Chongwe | Chalimbana | LC645878 |
|  | 12C19  | Chongwe | Chalimbana | LC645879 |
|  | 13C10  | Chongwe | Chalimbana | LC645880 |
|  | 15C11  | Chongwe | Chalimbana | LC645881 |
|  | 17C12  | Chongwe | Chalimbana | LC645882 |
|  | 45C25  | Chongwe | Chalimbana | LC645883 |
|  | 53X65  | Chongwe | Chinkuli   | LC645884 |
|  | 54C30  | Chongwe | Chinkuli   | LC645885 |
|  | 55C31  | Chongwe | Chinkuli   | LC645886 |
|  | 56X64  | Chongwe | Chinkuli   | LC645887 |
|  | 59C34  | Chongwe | Chinkuli   | LC645888 |
|  | 60C35  | Chongwe | Chinkuli   | LC645889 |
|  | 100C69 | Chongwe | Chinkuli   | LC645890 |
|  | 104X48 | Chongwe | Chinkuli   | LC645891 |
|  | 105X49 | Chongwe | Chinkuli   | LC645892 |
|  | 116X67 | Chongwe | Chinkuli   | LC645893 |
|  | 117X57 | Chongwe | Chinkuli   | LC645894 |
|  | 119X58 | Chongwe | Chinkuli   | LC645895 |
|  | 58C33  | Chongwe | Chinkuli   | LC645896 |
|  | 65C40  | Chongwe | Chinkuli   | LC645897 |
|  | 101C70 | Chongwe | Chinkuli   | LC645898 |
|  | 107X50 | Chongwe | Chinkuli   | LC645899 |
|  | 108X51 | Chongwe | Chinkuli   | LC645900 |
|  | 109X52 | Chongwe | Chinkuli   | LC645901 |
|  | 110X53 | Chongwe | Chinkuli   | LC645902 |
|  | 116X56 | Chongwe | Chinkuli   | LC645903 |
|  | 122X59 | Chongwe | Chinkuli   | LC645904 |
|  | 56C32  | Chongwe | Lwimba     | LC645905 |
|  | 62C37  | Chongwe | Lwimba     | LC645906 |
|  | 63C38  | Chongwe | Lwimba     | LC645907 |
|  | 64C39  | Chongwe | Lwimba     | LC645908 |
|  | 66X19  | Chongwe | Lwimba     | LC645909 |
|  | 51C28  | Chongwe | Lwimba     | LC645910 |
|  | 58C29  | Chongwe | Lwimba     | LC645911 |
|  | 61C36  | Chongwe | Lwimba     | LC645912 |
|  | 66C41  | Chongwe | Lwimba     | LC645913 |
|  | 67X20  | Chongwe | Lwimba     | LC645914 |
|  | 68C43  | Chongwe | Lwimba     | LC645915 |
|  | 69C44  | Chongwe | Lwimba     | LC645917 |
|  | 70C45  | Chongwe | Lwimba     | LC645918 |
|  | 67C42  | Chongwe | Lwimba     | LC645919 |
|  | 71X21  | Chongwe | Palabana   | LC645920 |
|  | 71C46  | Chongwe | Palabana   | LC645921 |
|  | 72C55  | Chongwe | Palabana   | LC645922 |
|  | 73X22  | Chongwe | Palabana   | LC645923 |

|  |        |          |                  |          |
|--|--------|----------|------------------|----------|
|  | 72C47  | Chongwe  | Palabana         | LC645924 |
|  | 77C50  | Chongwe  | Palabana         | LC645925 |
|  | 74C49  | Chongwe  | Palabana         | LC645926 |
|  | 79C52  | Chongwe  | Chongwe Central  | LC645927 |
|  | 82C53  | Chongwe  | Chongwe Central  | LC645928 |
|  | 86C54  | Chongwe  | Chongwe Central  | LC645929 |
|  | 87C56  | Chongwe  | Chongwe Central  | LC645930 |
|  | 91C60  | Chongwe  | Chongwe Central  | LC645931 |
|  | 92C61  | Chongwe  | Chongwe Central  | LC645932 |
|  | 94X23  | Chongwe  | Chongwe Central  | LC645933 |
|  | 97C66  | Chongwe  | Chongwe Central  | LC645934 |
|  | 98C67  | Chongwe  | Chongwe Central  | LC645935 |
|  | 99C68  | Chongwe  | Chongwe Central  | LC645936 |
|  | 78C51  | Chongwe  | Chongwe Central  | LC645937 |
|  | 88C57  | Chongwe  | Chongwe Central  | LC645938 |
|  | 89C58  | Chongwe  | Chongwe Central  | LC645939 |
|  | 90C59  | Chongwe  | Chongwe Central  | LC645940 |
|  | 94C63  | Chongwe  | Chongwe Central  | LC645941 |
|  | 1BA70  | Chisamba | Muswishi         | LC645942 |
|  | 2BA71  | Chisamba | Muswishi         | LC645943 |
|  | 3BA72  | Chisamba | Muswishi         | LC645944 |
|  | 4BA73  | Chisamba | Muswishi         | LC645945 |
|  | 5BA74  | Chisamba | Muswishi         | LC645946 |
|  | 6BA75  | Chisamba | Muswishi         | LC645947 |
|  | 7BA76  | Chisamba | Muswishi         | LC645948 |
|  | 8BA77  | Chisamba | Muswishi         | LC645949 |
|  | 09BA78 | Chisamba | Muswishi         | LC645950 |
|  | 10BA79 | Chisamba | Muswishi         | LC645951 |
|  | 11BA80 | Chisamba | Muswishi         | LC645952 |
|  | 12BA81 | Chisamba | Muswishi         | LC645953 |
|  | 13BA82 | Chisamba | Chisamba Central | LC645954 |
|  | 14BA83 | Chisamba | Chisamba Central | LC645955 |
|  | 15BA84 | Chisamba | Chisamba Central | LC645956 |
|  | 16BA85 | Chisamba | Chisamba Central | LC645957 |
|  | 17BA86 | Chisamba | Chisamba Central | LC645958 |
|  | 18BA87 | Chisamba | Chisamba Central | LC645959 |
|  | 19BA88 | Chisamba | Chisamba Central | LC645960 |
|  | 20BA89 | Chisamba | Chisamba Central | LC645961 |
|  | 21BA90 | Chisamba | Chisamba Central | LC645962 |
|  | 22BA91 | Chisamba | Chisamba Central | LC645963 |
|  | 23BA92 | Chisamba | Chisamba Central | LC645964 |
|  | 24BA93 | Chisamba | Chisamba Central | LC645965 |
|  | 25BA94 | Chisamba | Chisamba Central | LC645966 |
|  | 26BA95 | Chisamba | Chisamba Central | LC645967 |
|  | 27BA96 | Chisamba | Chisamba Central | LC645968 |
